# Supplementary material
Source: PubMed Central journal article supplement (PMC6702055)
Supplement: NIHMS1523271-supplement-Supplementary_Material.pdf [file NIHMS1523271-supplement-Supplementary_Material.pdf]

# Clinical Encounter Record: Oral Pre-Exposure Prophylaxis (PrEP)

Name of facility: \_\_\_\_\_ Delivery Point: \_\_\_\_\_ Tier: \_\_\_\_\_ MFL code: \_\_\_\_\_  
 County: \_\_\_\_\_ Sub county: \_\_\_\_\_ Ward: \_\_\_\_\_

## A. Client Profile

Unique client record number: \_\_\_\_\_ / \_\_\_\_\_ / \_\_\_\_\_ Initial visit date: dd / mm / yyyy

Name: First \_\_\_\_\_ Middle \_\_\_\_\_ Last \_\_\_\_\_ Telephone no: \_\_\_\_\_

Alien/National ID/passport/Birth Cert No: \_\_\_\_\_ NHIF No: \_\_\_\_\_ County of Birth \_\_\_\_\_

Sex:  Male  Female Date of birth: dd / mm / yyyy Age (years): \_\_\_\_\_ If age <19, attends school:  Yes  No  
 Marital status (select one):  Never married  Cohabiting  Married monogamous  Married polygamous  Separated/divorced  Widowed  
 Population Type:  Gen Population  Discordant couple  Key Population (Specify) \_\_\_\_\_  MSM  MSW  FSW  PWID

## B. Entry Point & Transfer Status

Referred from (select one):  
 HBTC  VCT site  OPD  MCH  TB clinic  IPD  CCC  
 Peer  Outreach  Self-referral  Community  Other: \_\_\_\_\_

If transferred in:  
 PrEP start date: dd / mm / yyyy Regimen:  TDF-FTC  TDF  TDF-3TC  
 Facility transferred from: \_\_\_\_\_ MFL code: \_\_\_\_\_ County: \_\_\_\_\_

## C. Baseline Assessment

### Behaviour risk assessment

Mark all that apply:

- Sex partner(s) is HIV+ and (mark all that apply):
  - Not on ART
  - On ART <6 months
  - Suspected poor adherence to ART
  - Detectable HIV viral load
  - Couple is trying to conceive
- Sex partner(s) high risk & HIV status is unknown
- Has sex with >1 partner
- Ongoing IPV/GBV
- Transactional sex
- Recent STI (past 6 months)
- Recurrent use of post-exposure prophylaxis (PEP)
- Recurrent sex under influence of alcohol/recreational drugs
- Inconsistent or no condom use
- Injection drug use with shared needles and/or syringes

(If yes to any) →

### Complete section if sex partner is HIV+

HIV+ partner CCC number: \_\_\_\_\_ / \_\_\_\_\_  
 or  NA (not enrolled at a CCC)  
 or  CCC number/enrollment status unknown

HIV+ partner ART start date: dd / mm / yyyy  
 or  not on ART at initial visit

Time known to be HIV-serodiscordant: \_\_\_\_\_ years + \_\_\_\_\_ months

Sex without a condom with HIV+ partner in past 30 days:  Yes  No

Number of living children with HIV+ partner: \_\_\_\_\_

### Medical assessment & fertility intentions

Blood pressure (mm Hg): \_\_\_\_\_ / \_\_\_\_\_ Temperature: \_\_\_\_\_ °C  
 Weight (kg): \_\_\_\_\_ Height (cm): \_\_\_\_\_  
 Signs/symptoms of STI:  Yes; Use codes provided: \_\_\_\_\_  No

**Male only:**  
 Circumcised:  Yes  No  Unknown

**Female only:**  
 LMP: dd / mm / yyyy  
 Pregnant:  Yes  No  
 If pregnant:  Planned  Unplanned  
 Breastfeeding:  Yes  No  
 On family planning:  Yes  No FP methods: \_\_\_\_\_  
 Plan to have children (select one):  
 Trying to conceive  Future  No  Don't know

| Chronic illnesses & comorbidities                                        | Treatment |
|--------------------------------------------------------------------------|-----------|
| Liver disease: <input type="checkbox"/> Yes <input type="checkbox"/> No  |           |
| Kidney disease: <input type="checkbox"/> Yes <input type="checkbox"/> No |           |
| 1. Other description                                                     |           |
| 2. Other description                                                     |           |

### Clinical notes:

## D. PrEP initiation

Lab results (Investigations should not delay PrEP initiation. To be recorded when available.)

| Test                | Result                                                                                                | Additional steps                                                                                                                      |
|---------------------|-------------------------------------------------------------------------------------------------------|---------------------------------------------------------------------------------------------------------------------------------------|
| Hepatitis B (HBsAg) | <input type="checkbox"/> Positive <input type="checkbox"/> Negative <input type="checkbox"/> Not done | If negative, vaccine series initiated: <input type="checkbox"/> Yes <input type="checkbox"/> No Date sample collected: dd / mm / yyyy |
| Hepatitis C         | <input type="checkbox"/> Positive <input type="checkbox"/> Negative <input type="checkbox"/> Not done | Date sample collected: dd / mm / yyyy                                                                                                 |
| Serum creatinine    | _____ (µmol/L) or <input type="checkbox"/> Not done                                                   | If done, CrCl (mL/min): _____ If creatinine is out of range, or CrCl <50 mL/min, refer for further assessment.                        |

Previous PrEP use:  Yes  No Condom Issued:  Yes  No  
 Willing to start PrEP:  Yes  No Adherence Counseling Done:  Yes  No  
 If not willing, reason (mark all that apply):  None  Side effects (ADR)  Stigma  Pill burden  Taking pills for a long time  Too many HIV tests

Signs/symptoms of acute HIV:  Yes  No  
 Medically ineligible to start PrEP:  Yes  No  
 Contraindications for TDF-FTC /TDF-3TC/TDF:  Yes  No

**Eligible for PrEP** → Prescribed PrEP at initial visit:  Yes  No  
 Regimen:  TDF-FTC  TDF  TDF-3TC  
 # of months: \_\_\_\_\_  
 Date of initiation: dd / mm / yyyy

Next appointment date: dd / mm / yyyy

Clinician initials: \_\_\_\_\_

**I. Monthly refill form**

To be filled each month when the client is coming for a refill only in the months appearing under date of refill column else fill the follow up visit

Unique client record number: \_\_\_\_\_ / \_\_\_\_\_ / \_\_\_\_\_

Name of client: \_\_\_\_\_

| Date of Refill | Behaviour risk assessment (Yes/No) | Adherence counselling (Yes/ No) | Continue /Discontinue PrEP (indicate appropriately) | Next appointment date | Remarks |
|----------------|------------------------------------|---------------------------------|-----------------------------------------------------|-----------------------|---------|
| Month 2        |                                    |                                 |                                                     | dd/mm/yyyy            |         |
| 4              |                                    |                                 |                                                     | dd/mm/yyyy            |         |
| 6              |                                    |                                 |                                                     | dd/mm/yyyy            |         |
| 7              |                                    |                                 |                                                     | dd/mm/yyyy            |         |
| 8              |                                    |                                 |                                                     | dd/mm/yyyy            |         |
| 10             |                                    |                                 |                                                     | dd/mm/yyyy            |         |
| 11             |                                    |                                 |                                                     | dd/mm/yyyy            |         |
| 13             |                                    |                                 |                                                     | dd/mm/yyyy            |         |
| 14             |                                    |                                 |                                                     | dd/mm/yyyy            |         |
| 16             |                                    |                                 |                                                     | dd/mm/yyyy            |         |
| 17             |                                    |                                 |                                                     | dd/mm/yyyy            |         |
| 19             |                                    |                                 |                                                     | dd/mm/yyyy            |         |
| 20             |                                    |                                 |                                                     | dd/mm/yyyy            |         |
| 22             |                                    |                                 |                                                     | dd/mm/yyyy            |         |
| 23             |                                    |                                 |                                                     | dd/mm/yyyy            |         |
| 25             |                                    |                                 |                                                     | dd/mm/yyyy            |         |
| 26             |                                    |                                 |                                                     | dd/mm/yyyy            |         |
| 28             |                                    |                                 |                                                     | dd/mm/yyyy            |         |
| 29             |                                    |                                 |                                                     | dd/mm/yyyy            |         |
| 31             |                                    |                                 |                                                     | dd/mm/yyyy            |         |
| 32             |                                    |                                 |                                                     | dd/mm/yyyy            |         |
| 34             |                                    |                                 |                                                     | dd/mm/yyyy            |         |
| 36             |                                    |                                 |                                                     | dd/mm/yyyy            |         |
| 37             |                                    |                                 |                                                     | dd/mm/yyyy            |         |
| 38             |                                    |                                 |                                                     | dd/mm/yyyy            |         |
| 40             |                                    |                                 |                                                     | dd/mm/yyyy            |         |
| 41             |                                    |                                 |                                                     | dd/mm/yyyy            |         |
| 43             |                                    |                                 |                                                     | dd/mm/yyyy            |         |
| 44             |                                    |                                 |                                                     | dd/mm/yyyy            |         |
| 46             |                                    |                                 |                                                     | dd/mm/yyyy            |         |
| 47             |                                    |                                 |                                                     | dd/mm/yyyy            |         |
| 49             |                                    |                                 |                                                     | dd/mm/yyyy            |         |
| 50             |                                    |                                 |                                                     | dd/mm/yyyy            |         |
| 52             |                                    |                                 |                                                     | dd/mm/yyyy            |         |
| 53             |                                    |                                 |                                                     | dd/mm/yyyy            |         |
| 55             |                                    |                                 |                                                     | dd/mm/yyyy            |         |
| 56             |                                    |                                 |                                                     | dd/mm/yyyy            |         |

## Follow Up Visit

Unique client record number: \_\_\_\_\_ / \_\_\_\_\_ / \_\_\_\_\_ Name of client: \_\_\_\_\_

Visit date: *dd / mm / yyyy*

Visit type:  scheduled  **unscheduled**

### E. Medical assessment & fertility intentions

#### Clinical notes

#### Summary of findings

Blood pressure \_\_\_\_\_ / \_\_\_\_\_ mm Hg  
 Weight \_\_\_\_\_ kg Temperature \_\_\_\_\_ °C  
 Signs/symptoms of STI(s)  yes  no If yes Use codes provided \_\_\_\_\_  
 Signs/symptoms of acute HIV  yes  no  
 If male, circumcised since last visit  yes  no  na (already circumcised)

Possible adverse drug reaction  none

1 *Description* \_\_\_\_\_  
 mild  moderate  severe  life threatening  not graded  
 Action (mark all that apply)  stop  switched regimen  Other \_\_\_\_\_

2 *Description* \_\_\_\_\_  
 mild  moderate  severe  life threatening  not graded  
 Action (mark all that apply)  stop  switched regimen  Other \_\_\_\_\_

| Chronic illnesses & comorbidities                                       | Treatment |
|-------------------------------------------------------------------------|-----------|
| Liver disease <input type="checkbox"/> Yes <input type="checkbox"/> No  |           |
| Kidney disease <input type="checkbox"/> Yes <input type="checkbox"/> No |           |

1 *Other description* \_\_\_\_\_  
 2 *Other description* \_\_\_\_\_

#### Plan to have children

If female LMP: \_\_\_\_\_ Pregnant  trying to conceive  future  no  don't know  client/partner is pregnant  
 Breastfeeding  yes  no  
 On family planning  yes  no  
 If ended pregnancy since last visit \_\_\_\_\_ or methods (Indicate the code): \_\_\_\_\_

Outcome date *dd / mm / yyyy*  
 Outcome  term live  preterm live  induced abortion  loss  
 Birth defect(s)  yes  no  don't know

### F. Behaviour risk assessment

#### Mark all that apply

- |                                                                                                                                                                                                                                                                                                            |                                                                                                                                                                                                                                                                        |                                                                                                                                                                                                                                                              |
|------------------------------------------------------------------------------------------------------------------------------------------------------------------------------------------------------------------------------------------------------------------------------------------------------------|------------------------------------------------------------------------------------------------------------------------------------------------------------------------------------------------------------------------------------------------------------------------|--------------------------------------------------------------------------------------------------------------------------------------------------------------------------------------------------------------------------------------------------------------|
| <input type="checkbox"/> Sex partner(s) is HIV+ and:<br><input type="checkbox"/> not on ART<br><input type="checkbox"/> <6 months ART use<br><input type="checkbox"/> poor adherence to ART<br><input type="checkbox"/> detectable HIV viral load<br><input type="checkbox"/> couple is trying to conceive | <input type="checkbox"/> Sex partner(s) at high risk for HIV & HIV status unknown<br><input type="checkbox"/> Has sex with >1 partner<br><input type="checkbox"/> Ongoing IPV/GBV<br><input type="checkbox"/> Transactional sex<br><input type="checkbox"/> Recent STI | <input type="checkbox"/> Recurrent use of PEP<br><input type="checkbox"/> Recurrent sex under influence of alcohol/recreational drugs<br><input type="checkbox"/> Inconsistent or no condom use<br><input type="checkbox"/> IDU with shared needles/syringes |
|------------------------------------------------------------------------------------------------------------------------------------------------------------------------------------------------------------------------------------------------------------------------------------------------------------|------------------------------------------------------------------------------------------------------------------------------------------------------------------------------------------------------------------------------------------------------------------------|--------------------------------------------------------------------------------------------------------------------------------------------------------------------------------------------------------------------------------------------------------------|

### G. Follow up laboratory investigations

|                                                        |                                                                                                       |                                                                                                                                 |
|--------------------------------------------------------|-------------------------------------------------------------------------------------------------------|---------------------------------------------------------------------------------------------------------------------------------|
| HIV test                                               | <input type="checkbox"/> Positive <input type="checkbox"/> negative <input type="checkbox"/> not done | If positive, collect sample for drug resistance. Client linked to care <input type="checkbox"/> Yes <input type="checkbox"/> No |
| Serum creatinine (as per guidelines)                   | _____ μmol/L or <input type="checkbox"/> not done                                                     | If creatinine is out of range, or CrCl <50 mL/min, refer for further assessment                                                 |
| If creatinine done, CrCl ≥50 mL/min                    | <input type="checkbox"/> yes <input type="checkbox"/> no                                              |                                                                                                                                 |
| Other (write in test, results & units [if applicable]) | 1 _____<br>2 _____                                                                                    |                                                                                                                                 |

### H. PrEP

Self-assessment of adherence since last visit  Good  Fair  Bad  n/a (did not pick up PrEP at last visit)  
 If Fair/ bad, reason(s) (mark all that apply)  forgot  lost/out of pills  separated from HIV+ partner  no perceived risk  side effects  sick  
 stigma  pill burden  shared with others  none  other \_\_\_\_\_

Adherence Counseling done  yes  no **Condoms issued:**  yes  no

PrEP status  continue  restart  discontinue

Prescribed PrEP today  yes  no  
 TDF-FTC  TDF  TDF-3TC number of months \_\_\_\_\_

If yes, regimen and duration \_\_\_\_\_  
 If discontinued, reason(s) (mark all that apply)  HIV test is positive  low risk of HIV  renal dysfunction  client request  not adherent to PrEP  
 viral suppression of HIV+ partner  too many HIV tests  other \_\_\_\_\_

#### Adherence

#### Clinician initials:

#### Adherence

Good: missed 0-3 doses in past 1 month  
 Fair: missed 4-5 doses in past 1 month  
 Bad: missed 6-7 doses in past 1 month

#### Creatinine clearance

$$\text{GFR (adult males)} = \frac{(140 - \text{Age}) \times 1.23}{\text{serum creatinine (in micromol/L)}}$$

$$\text{GFR (adult females)} = \frac{(140 - \text{Age}) \times 1.23}{\text{serum creatinine (in micromol/L)}} \times 0.85$$

#### FP Methods:

C = Condoms  
 TL = Tubal ligation/female sterilization  
 FA = Fertility awareness method/periodic abstinence  
 D = Diaphragm/cervical cap  
 LAM = Lactational Amenorrhea Method  
 IUD = Intra uterine device  
 IMP = Implant  
 INJ = Injectable  
 OC = oral contraceptive pills  
 ECP = Emergency contraceptive pills dispensed  
 V = Vasectomy (partner's)

#### STI Diagnosis:

Genital Ulcer Disease (GUD),  
 Vaginitis and/or Vaginal Discharge (VG),  
 Cervicitis and/or Cervical Discharge (CD),  
 Pelvic Inflammatory Disease (PID),  
 Urethral Discharge (UD),  
 Anal Discharge (AD),  
 Others (O)
